# Supplementary material for: Does Inflammatory Bowel Disease Elevate Infection Risk in Total Hip Arthroplasty? Insights from a nationwide study highlighting steroid use as the key determinant
Source: Research Square preprint supplement (doi:10.21203/rs.3.rs-5669146/v1), 2024-12-26
Supplement: Supplementary file 1 [file ad65bafd14692a76c3a359cb.docx]

**Supplementary Table S1. ICD-10 codes used in this study**

|  | **ICD-10-Codesa** | |
| --- | --- | --- |
| Avascular necrosis | M87, M903, M904, M905 | |
| Hip osteoarthritis | M16 | |
| Femoral neck fracture | S720 | |
| Crohn disease | K50 | |
| Ulcerative colitis | K51 | |
|  | **Procedure codes** | |
| Primary total hip arthroplasty | N0711, N2070 | |
| **Surgical complications** | | |
| Superficial surgical site infection | **ICD10-Diagnosis code** |  |
| T814 |  |
| Periprosthetic joint infection | **ICD10-Diagnosis code** |  |
| T845, T846, T847, T857 |  |
| Periprosthetic fracture | **ICD10-Diagnosis code** |  |
| M966 |  |
| Dislocation | **ICD10-Diagnosis code** |  |
| S730, M243, M244 |  |
| Revision |  | **Operation procedure code** |
| N1711, N1721, N3710, N3720 |
